# Supplementary material for: An antibiotic agent pyrrolo[1,2-a]pyrazine-1,4-dione,hexahydro isolated from a marine bacteria Bacillus tequilensis MSI45 effectively controls multi-drug resistant Staphylococcus aureus
Source: Royal Society of Chemistry journal article supplement (doi:10.1039/c8ra00820e), 2018-01-01
Supplement: c8ra00820e1.pdf [file c8ra00820e1.pdf]

### Supplementary Figure legends

Supplementary Figure 1) Non- Hemolytic nature of the compound MSI45 on blood agar plates.

Supplementary Figure 2)  $^1\text{H}$  and  $^{13}\text{C}$  NMR spectrum of the compound MSI45 showing characteristic peaks at  $\delta\text{H}$  1.8 -2.3 and at (2H) peak at 3.5 – 3.6 and signals at 3.8 (d, 1H), 3.9 (d, 1H), 4.1 (dd, 1H) and 7.1 (1H, S) The  $^{13}\text{C}$  NMR spectrum showed signals at  $\delta$ 22.23, 28.93, 45.78, 46.01, 58.04, 164.63, 169.51 showing the compound as pyrrolo[1,2-A]pyrazine-1,4-dione,hexahydro

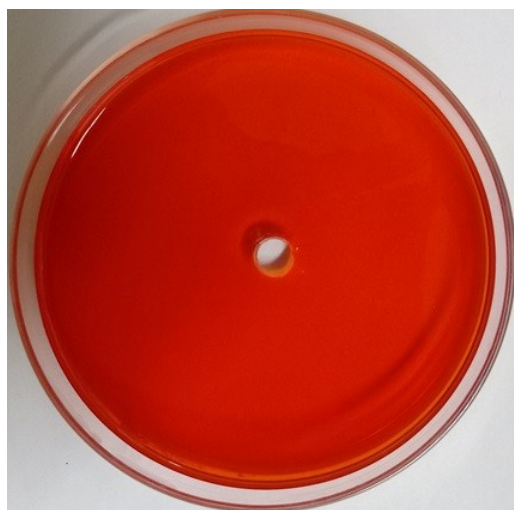

Figure S1.

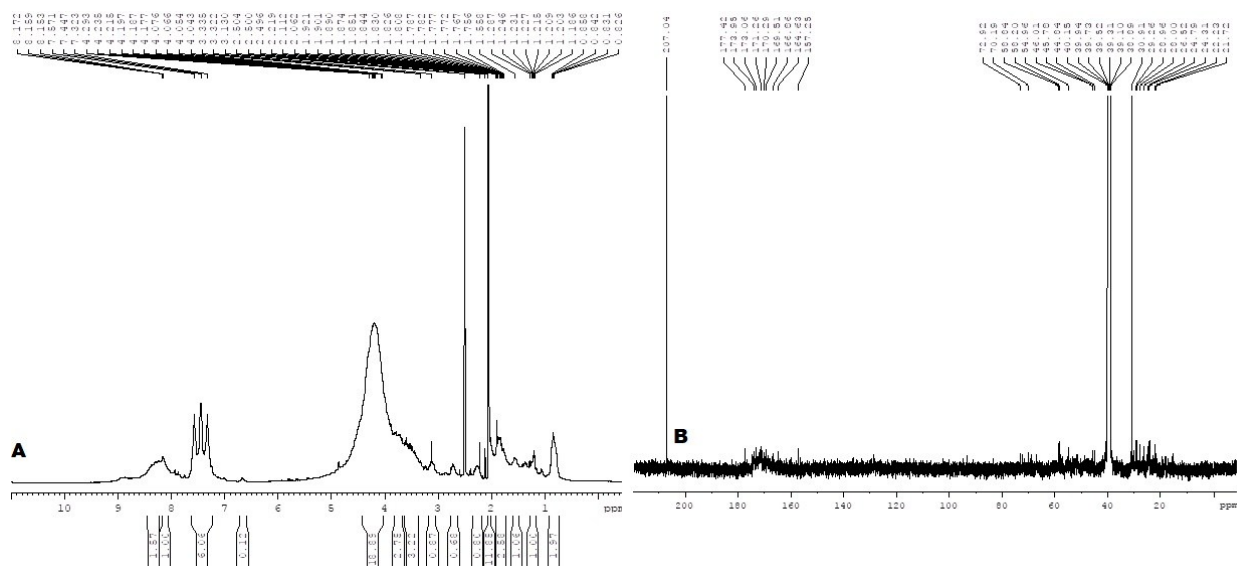

Figure S2.
